# Supplementary material for: Photocatalytic degradation of organic dyes and phenol by iron-silicate glass prepared by the sol–gel method
Source: Royal Society of Chemistry journal article supplement (doi:10.1039/d1nj03459f), 2021-01-01

**Table S1.** Surface areas, average pore volume, and average pore radii of *a*FS glass samples with ‘*a*’ of 10, 15 and 20.

| Catalyst | SBET (m <sup>2</sup> g <sup>-1</sup> ) | Average pore volume ×10 <sup>-2</sup> (cm <sup>3</sup> g <sup>-1</sup> ) | Average pore radii (nm) |
|----------|----------------------------------------|--------------------------------------------------------------------------|-------------------------|
| 10FS     | 6.53                                   | 13.3                                                                     | 7.99                    |
| 15FS     | 4.32                                   | 7.92                                                                     | 7.99                    |
| 20FS     | 4.10                                   | 6.62                                                                     | 1.21                    |

**Table S2.** Photocatalytic degradation percentage, and first-order kinetic rate constants for the degradation of methylene blue, rhodamine B, methyl orange, congo red and phenol under visible light irradiation.

| Organic pollutants | Concentration | Glass sample | Degradation (%) | First order rate constants ( <i>k</i> × 10 <sup>-3</sup> min <sup>-1</sup> ) |
|--------------------|---------------|--------------|-----------------|------------------------------------------------------------------------------|
| Methylene Blue     | 20 μM         | 10FS         | 36              | 7                                                                            |
|                    |               | 15FS         | 45              | 9                                                                            |
|                    |               | 20FS         | 97              | 62                                                                           |
| Rhodamine B        | 20 μM         | 20FS         | 95              | 30                                                                           |
| Methyl Orange      | 20 μM         | 20FS         | 88              | 35                                                                           |
| Congo Red          | 20 μM         | 20FS         | 78              | 8                                                                            |
| Phenol             | 50 ppm        | 20FS         | 96              | 5                                                                            |

**Fig. S1.** Photocatalytic degradation of MB using heat-treated *a*FS glass with '*a*' of 10 (red), 15 (black) and 20 (green) without light irradiation (Dark conditions).

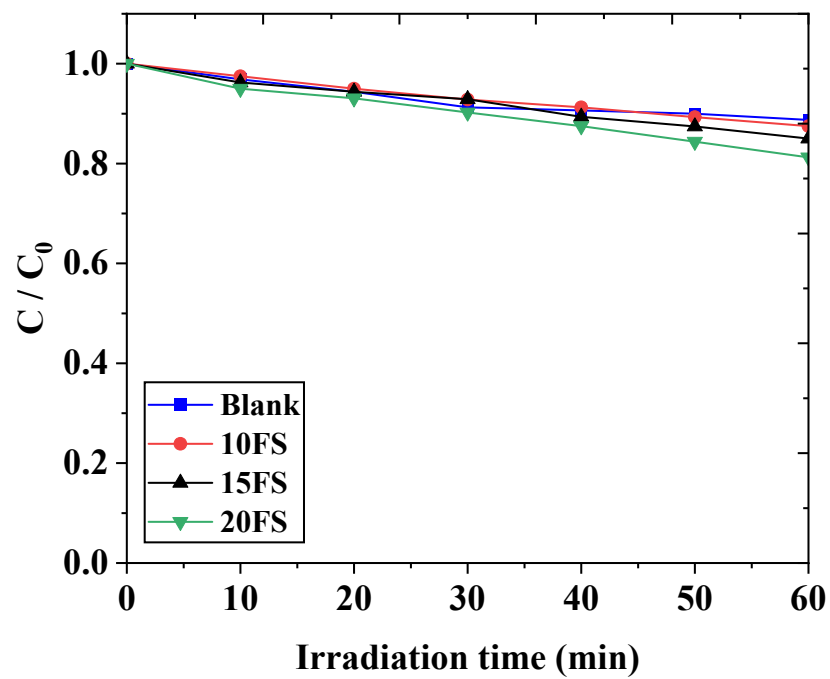

**Fig. S2.** Photocatalytic degradation of organic dyes using heat-treated 20FS glass sample without light irradiation (Dark conditions).

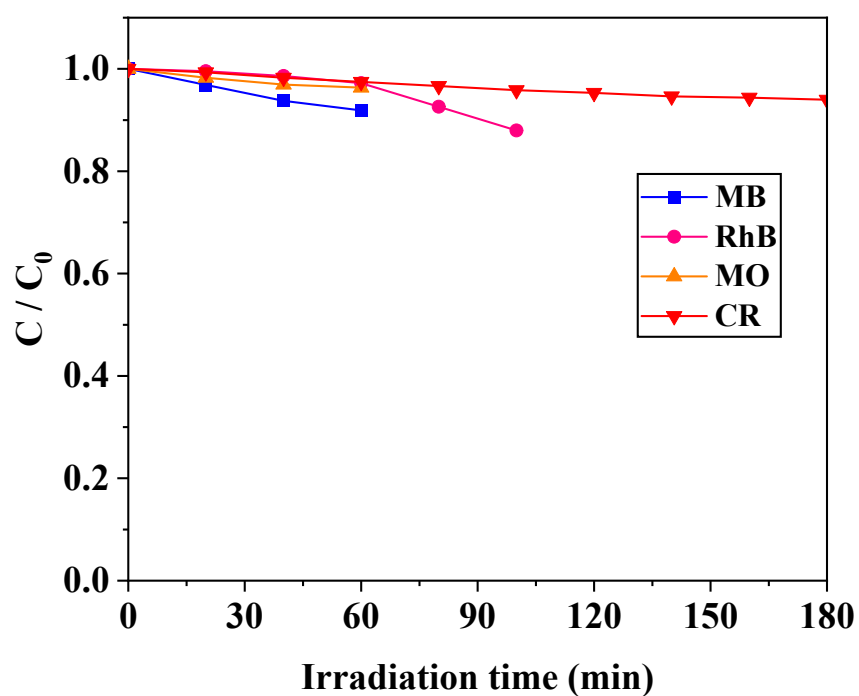

**Fig. S3.** TOC and COD removal of phenol using 20FS under visible light irradiation.

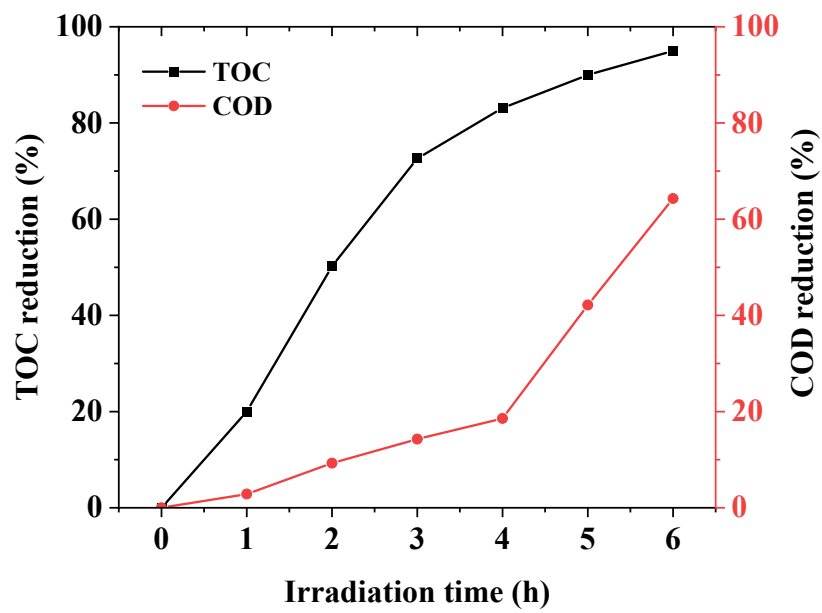

**Fig. S4.** The proposed mechanism for the photocatalytic degradation of organic pollutants by  $\alpha$ - $\text{Fe}_2\text{O}_3$  nanoparticles and hydrogen peroxide under visible light irradiation.

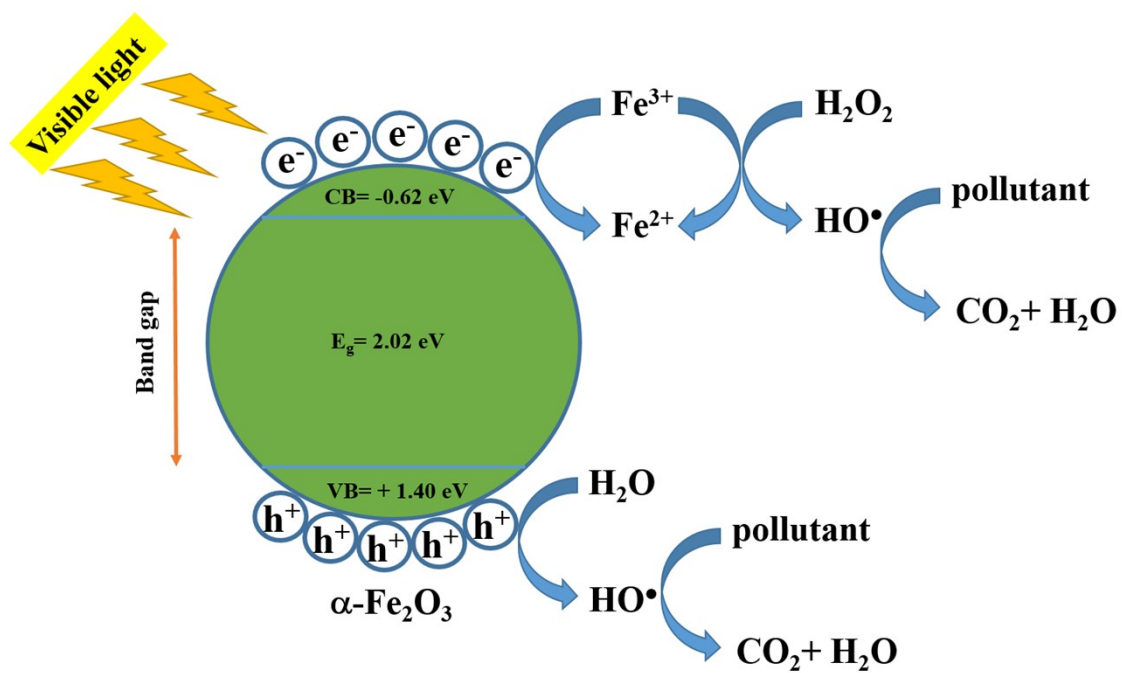

**Fig. S5.** Factorial effects for the photocatalytic degradation of MB using heat-treated 20FS under visible-light irradiation: (a) Catalyst amount, (b) Initial  $\text{H}_2\text{O}_2$  concentration, (c) MB dye concentration and (d) wavelength of light irradiation (action spectrum).

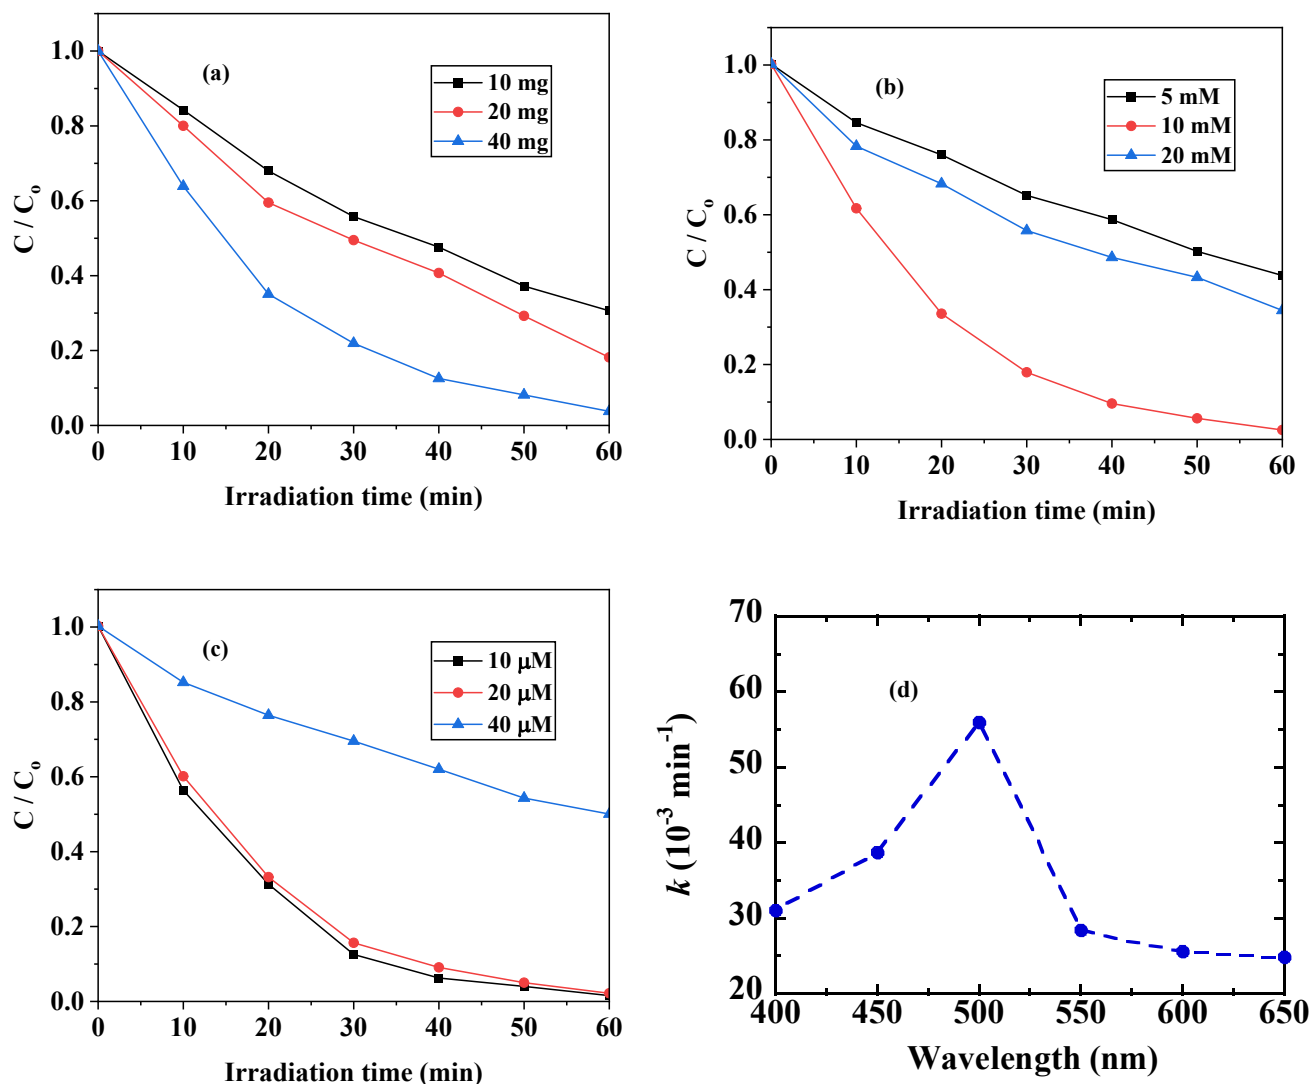

Supplement: d1nj03459f1.pdf [file d1nj03459f1.pdf]
